# Supplementary material for: Use of a service evaluation and lean thinking transformation to redesign an NHS 111 refer to community Pharmacy for Emergency Repeat Medication Supply Service (PERMSS)
Source: PubMed Central journal article supplement — BMJ Open. 2016 Aug 25;6(8):e011269. doi: 10.1136/bmjopen-2016-011269 (PMC5013361; doi:10.1136/bmjopen-2016-011269), 2016-08-25
Supplement: bmjopen-2016-011269supp1.pdf [file bmjopen-2016-011269supp1.pdf]

**Supplemental File 1.** List of attendees to the Kaizen workshop (n=22)

Community pharmacists (n=2)

NHS 111 call handler

NHS 111 team leader

PERMSS service user

Patient (non-PERMSS service user – Healthwatch representative)

GP OOH clinician

GP urgent care centre clinician

Urgent care centre nurse practitioner

GP representative

Local Pharmacy Network representatives (n=2)

Independent evaluator

PharmOutcomes representative

CCG pharmacy representatives (NECS) (n=2)

NECS NHS 111 Directory of Services representative

NECS workshop facilitators (n=2)

NHS England clinical strategy and workshop facilitator

CCGs service planning and reform representative

NHS England pharmacy contractor
