# Supplementary material for: Use of a service evaluation and lean thinking transformation to redesign an NHS 111 refer to community Pharmacy for Emergency Repeat Medication Supply Service (PERMSS)
Source: PubMed Central journal article supplement — BMJ Open. 2016 Aug 25;6(8):e011269. doi: 10.1136/bmjopen-2016-011269 (PMC5013361; doi:10.1136/bmjopen-2016-011269), 2016-08-25
Supplement: bmjopen-2016-011269supp2.pdf [file bmjopen-2016-011269supp2.pdf]

**Supplemental file 2.** Patient journey for NHS 111 referred patients to community pharmacy for emergency repeat medication supplies via current state and future state PERMSS.

| Current state of patient journey |                                                                                                                                                                        |                                                                                                                                                 | Future state of patient journey |                                                                                                                                                                                                                        |                                                                                          |
|----------------------------------|------------------------------------------------------------------------------------------------------------------------------------------------------------------------|-------------------------------------------------------------------------------------------------------------------------------------------------|---------------------------------|------------------------------------------------------------------------------------------------------------------------------------------------------------------------------------------------------------------------|------------------------------------------------------------------------------------------|
| Step                             | Activities                                                                                                                                                             | Notes                                                                                                                                           | Step                            | Activities                                                                                                                                                                                                             | Notes                                                                                    |
| 1 Δ                              | Patient calls NHS 111.                                                                                                                                                 |                                                                                                                                                 | 1 Δ                             | Patient calls NHS 111.                                                                                                                                                                                                 |                                                                                          |
| 2 ¥                              | Call handler picks up call and collects demographic data.                                                                                                              |                                                                                                                                                 | 2 ¥                             | Call handler picks up call and collects demographic data.                                                                                                                                                              |                                                                                          |
| 3 ¥                              | Call handler identifies as 'emergency supply' or otherwise.                                                                                                            | No check of Controlled Drug at this stage.                                                                                                      | 3 ¥                             | Call handler identifies as 'emergency supply' or otherwise.                                                                                                                                                            | No check of Controlled Drug at this stage since no drug information is collected at all. |
| 4 Ø ¥                            | Call handler undergoes 'triage assessment'.                                                                                                                            | Patients presents as unwell and directed to appropriate service.                                                                                | 4 Ø ¥                           | Call handler undergoes 'triage assessment'.                                                                                                                                                                            | Patients presents as unwell and directed to appropriate service.                         |
| 5                                | Frequency and time for next dose determined.                                                                                                                           |                                                                                                                                                 | 5 Ø ¥                           | Available pharmacy provision checked.                                                                                                                                                                                  | Patient may refuse pharmacist referral.                                                  |
| 6 Ø ¥                            | Available pharmacy provision checked.                                                                                                                                  | Patient may refuse pharmacist referral.                                                                                                         | 6 ¥                             | Patient is advised of pharmacy address.                                                                                                                                                                                |                                                                                          |
| 7 Δ                              | Call handler required to log into PharmOutcomes which is external to the NHS 111 Pathways system.                                                                      |                                                                                                                                                 | 7                               | Pharmacy for the referral is selected and call is closed.                                                                                                                                                              |                                                                                          |
| 8 Π                              | Demographics entered.                                                                                                                                                  |                                                                                                                                                 | 8                               | Referral received by Community pharmacy on PharmOutcomes via accredited an inter-operability toolkit system. This tool pushes data from the NHS Pathways system automatically onto PharmOutcomes to make the referral. |                                                                                          |
| 9 ∞                              | Names of drugs and dosages entered, and calculate 7 days' supply that is required (if there are >4 drugs have to make another PharmOutcomes entry, go back to step 7). | Includes correct spelling, dosages, strengths, all of which is collected by a non-clinical member of staff. Again no check of controlled drugs. | 9 ¥                             | Patient presents at community pharmacy.                                                                                                                                                                                |                                                                                          |

|                 |                                                                                          |                                                                                                                                                                                 |               |                                                                                                    |                                                                                                                                                                                                         |
|-----------------|------------------------------------------------------------------------------------------|---------------------------------------------------------------------------------------------------------------------------------------------------------------------------------|---------------|----------------------------------------------------------------------------------------------------|---------------------------------------------------------------------------------------------------------------------------------------------------------------------------------------------------------|
| <b>10 Π</b>     | Match Directory of Services to PharmOutcomes, i.e. final pharmacy on PharmOutcomes list. |                                                                                                                                                                                 | <b>10 Ø ¥</b> | Community pharmacist undertakes clinical assessment of the patient.                                | An emergency supply may not be required, is clinically inappropriate, or requires further clinical assessment. In the latter case the patient should receive onward referral to an appropriate service. |
| <b>11 Ø ¥</b>   | Call handler checks that the patient has proof that this is a repeat medication.         | Patient may not have proof of current medication to provide to the pharmacist.                                                                                                  | <b>11 Δ Ø</b> | Community pharmacist checks stock.                                                                 | Stock may not be available. Pharmacist has option to refer to another pharmacy.                                                                                                                         |
| <b>12</b>       | Send referral to nominated community pharmacy.                                           |                                                                                                                                                                                 | <b>12 ¥</b>   | Community pharmacist supplies medications.                                                         |                                                                                                                                                                                                         |
| <b>13 ¥</b>     | Patient is advised of pharmacy address.                                                  |                                                                                                                                                                                 | <b>13 Ø ¥</b> | Community pharmacist provides any appropriate additional pharmaceutical services or offers advice. | Patient leaves pathway with a medication supply.                                                                                                                                                        |
| <b>14 ¥</b>     | Patient presents at community pharmacy.                                                  |                                                                                                                                                                                 | <b>14 ¥</b>   | Post-consultation completed on PharmOutcomes.                                                      |                                                                                                                                                                                                         |
| <b>15 Δ</b>     | Community pharmacist checks PharmOutcomes for referral.                                  |                                                                                                                                                                                 | <b>15 Π</b>   | Emergency supply record made as per community pharmacy standard operating procedure.               |                                                                                                                                                                                                         |
| <b>16 Δ Ø</b>   | Community pharmacist reviews referral.                                                   | Some pharmacists may check for accurateness of data within the referral, such as strength, and dosage, and use this in their clinical judgement to reject or action a referral. | <b>16 ¥</b>   | Electronic feedback sent to GP.                                                                    |                                                                                                                                                                                                         |
| <b>17 Π Ø ¥</b> | Community pharmacist undertakes clinical assessment of the patient.                      | An emergency supply may not be required, or is clinically inappropriate. If                                                                                                     |               |                                                                                                    |                                                                                                                                                                                                         |

|                         |                                                                                                    |                                                                                                                    |  |  |
|-------------------------|----------------------------------------------------------------------------------------------------|--------------------------------------------------------------------------------------------------------------------|--|--|
|                         |                                                                                                    | a patient requires further clinical assessment then they should receive onward referral to an appropriate service. |  |  |
| 18 $\Delta \emptyset$   | Community pharmacist checks stock.                                                                 | Stock may not be available. Pharmacist could refer to another pharmacy if the stock is found elsewhere.            |  |  |
| 19 $\text{¥}$           | Community pharmacist supplies medications.                                                         |                                                                                                                    |  |  |
| 20 $\emptyset \text{¥}$ | Community pharmacist provides any appropriate additional pharmaceutical services or offers advice. | Patient leaves pathway with a medication supply.                                                                   |  |  |
| 21 $\text{¥}$           | Post-consultation completed on PharmOutcomes.                                                      | Not standard procedure to enter details onto PharmOutcomes for a non-PERMSS emergency supply.                      |  |  |
| 22 $\text{  }$          | Emergency supply record made as per community pharmacy standard operating procedure.               |                                                                                                                    |  |  |
| 23 $\text{¥}$           | Electronic feedback sent to GP.                                                                    |                                                                                                                    |  |  |

$\Delta$  = Patient wait,  $\emptyset$  = Patient exit point,  $\text{||}$  = Duplication of activities,  $\infty$  = bottleneck,  $\text{¥}$  = add value
